# Supplementary figures and images for: Effectiveness and Factors Associated with Improved Life Skill Levels of Participants of a Large-Scale Youth-Focused Life Skills Training and Counselling Services Program (LSTCP): Evidence from India
Source: MDPI journal article supplement (doi:10.3390/bs12060191), 2022-06-15

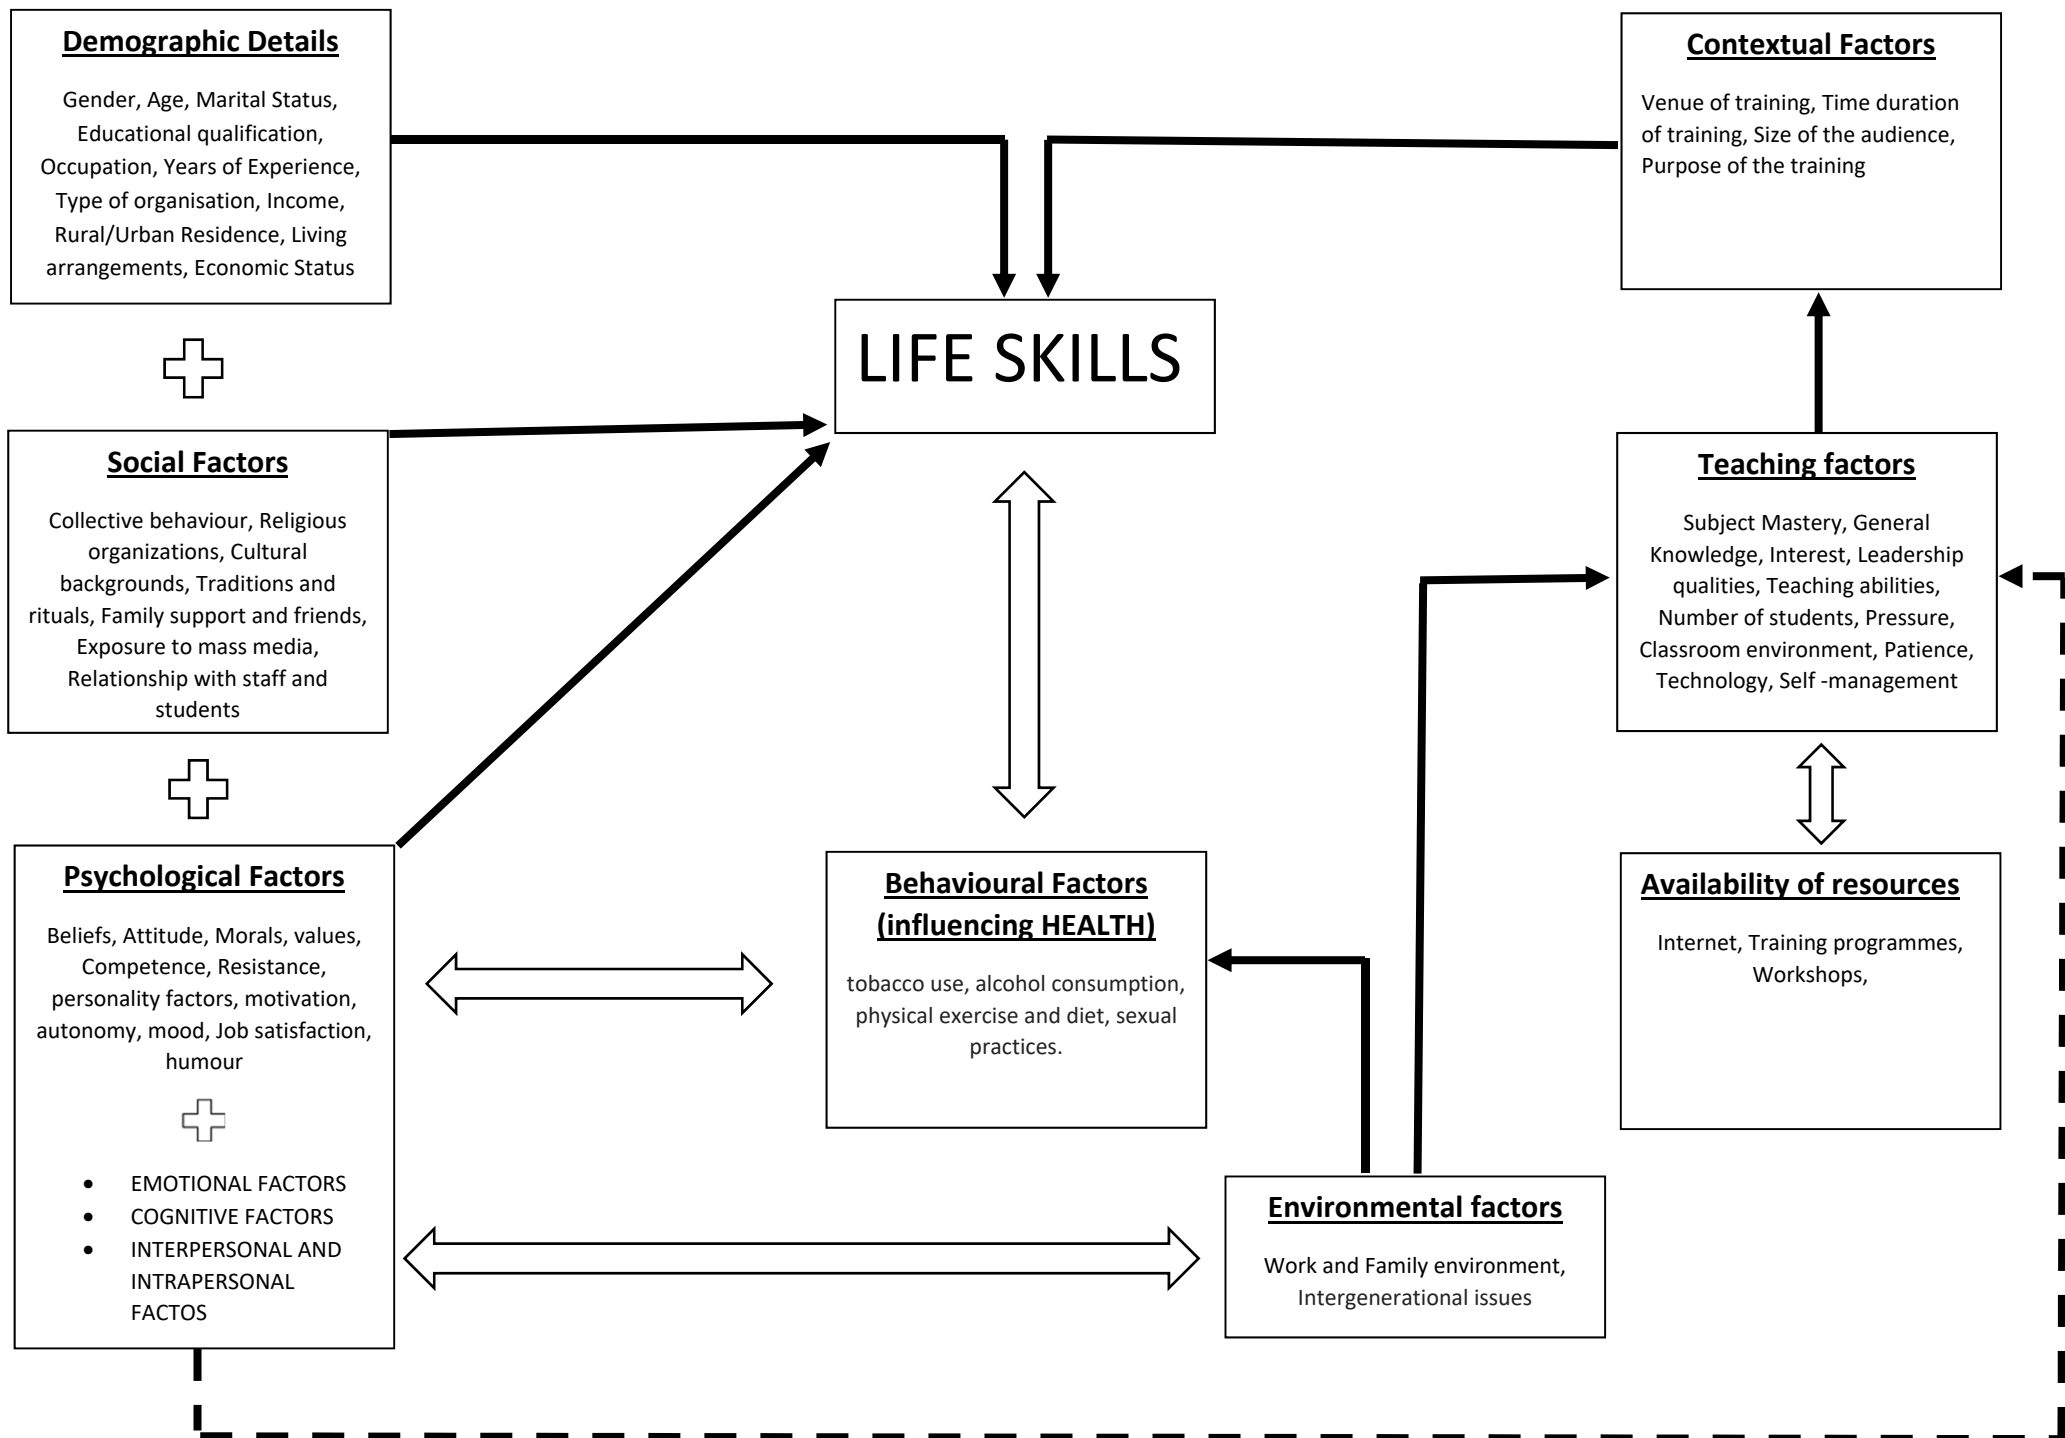

Direct causal effects  
 Indirect causal effects  
 Bidirectional causal effects

Supplement: s1 [file s1]
